# Supplementary material
Source: bioRxiv or medRxiv preprint supplement (https://medrxiv.org/highwire/filestream/80917/field_highwire_adjunct_files/1/2020.05.11.20098061-2.pdf)
Supplement: Supplementary file [file 2020.05.11.20098061-2.pdf]

**Table 2 - Relative frequencies for each question of COVID-19's Questionnaire regarding "Gender", "Education" and "Risk Factor".**

| Variable    |                           | Gender |       | Education     |          | Risk Factor    |            |
|-------------|---------------------------|--------|-------|---------------|----------|----------------|------------|
|             |                           | Female | Male  | Undergraduate | Graduate | Non-Risk Group | Risk Group |
| Question 1  | No                        | 3.82   | 2.20  | 3.11          | 3.45     | 0.00           | 4.86       |
|             | Yes                       | 96.18  | 97.80 | 96.89         | 96.55    | 100.00         | 95.14      |
| Question 2  | Other                     | 36.64  | 32.97 | 31.60         | 58.62    | 43.59          | 32.12      |
|             | Fever                     | 65.65  | 72.53 | 66.84         | 79.31    | 75.64          | 67.88      |
|             | Cough                     | 77.10  | 69.23 | 73.06         | 79.31    | 85.9           | 70.80      |
|             | Dyspnea                   | 67.95  | 68.13 | 69.95         | 55.17    | 64.10          | 73.72      |
| Question 3  | No                        | 33.58  | 32.96 | 30.05         | 55.17    | 51.47          | 27.08      |
|             | I don't know              | 26.72  | 23.08 | 27.46         | 10.34    | 16.67          | 29.86      |
|             | Yes                       | 39.69  | 43.96 | 42.48         | 34.48    | 38.46          | 43.06      |
| Question 4  | Other                     | 52.67  | 47.25 | 50.78         | 51.72    | 62.82          | 43.75      |
|             | Respiratory Etiquette     | 5.34   | 1.10  | 3.63          | 3.45     | 5.13           | 2.78       |
|             | Handwashing               | 48.85  | 41.76 | 43.52         | 58.62    | 52.56          | 41.67      |
|             | Social Isolation          | 80.15  | 74.73 | 75.13         | 96.55    | 76.92          | 77.78      |
| Question 5  | No/I don't know           | 17.56  | 17.95 | 22.80         | 20.69    | 14.10          | 27.08      |
|             | Stay at home and call SNS | 82.44  | 82.05 | 77.20         | 79.31    | 85.90          | 72.92      |
| Question 6  | No/I don't know           | 29.77  | 17.58 | 76.17         | 68.97    | 66.67          | 79.86      |
|             | Correct answer            | 70.23  | 82.42 | 23.83         | 31.03    | 33.33          | 20.14      |
| Question 7  | No                        | 84.93  | 81.31 | 82.90         | 86.21    | 91.03          | 79.17      |
|             | I don't know              | 6.11   | 2.20  | 4.66          | 3.45     | 2.56           | 5.56       |
|             | Yes                       | 9.16   | 16.48 | 12.43         | 10.34    | 6.41           | 15.28      |
| Question 8  | No                        | 94.66  | 85.71 | 90.16         | 96.55    | 94.87          | 88.89      |
|             | I don't know              | 0.76   | 2.20  | 1.55          | 0.00     | 0.00           | 2.08       |
|             | Yes                       | 0.46   | 12.09 | 8.29          | 3.45     | 5.13           | 9.03       |
| Question 9  | No                        | 62.59  | 47.25 | 53.37         | 75.86    | 80.77          | 43.05      |
|             | I don't know              | 14.5   | 12.09 | 14.51         | 6.90     | 11.54          | 14.58      |
|             | Yes                       | 22.9   | 40.66 | 32.64         | 17.24    | 7.69           | 42.36      |
| Question 10 | No                        | 61.07  | 58.24 | 58.03         | 72.41    | 74.36          | 52.08      |
|             | I don't know              | 16.03  | 14.29 | 16.06         | 10.34    | 7.69           | 19.44      |
|             | Yes                       | 22.90  | 27.47 | 25.91         | 17.24    | 17.95          | 28.47      |

|             |              |       |       |       |        |       |       |
|-------------|--------------|-------|-------|-------|--------|-------|-------|
| Question 11 | No           | 6.87  | 3.30  | 6.22  | 0.00   | 3.85  | 6.25  |
|             | I don't know | 4.58  | 7.69  | 6.74  | 0.00   | 2.56  | 7.64  |
|             | Yes          | 88.55 | 89.01 | 87.05 | 100.00 | 93.59 | 86.11 |
| Question 12 | No           | 3.05  | 3.30  | 3.63  | 0.00   | 1.28  | 4.17  |
|             | I don't know | 16.03 | 8.79  | 14.51 | 3.45   | 11.54 | 13.89 |
|             | Yes          | 80.92 | 87.91 | 81.87 | 96.55  | 87.18 | 81.94 |
